# Supplementary material
Source: publisher figshare collection journal article supplement (https://rs.figshare.com/ndownloader/files/14513219)
Supplement: Supplementary file 1 [file 14513219]

**Unravelling the macro-evolutionary ecology of fish-jellyfish associations: life in the ‘gingerbread house’**

Donal C. Griffina, Chris Harrodb,c, Jonathan D.R. Houghtona, Isabella Capellinid, e

List of papers detailing jellyfish-fish associations

**Alvariño (1985)**

ALVARINO, A. 1985. Predation in the plankton realm; mainly with reference to fish larvae. Invest. Mar. CICIMAR, 2: 1 – 122

**Andriasheu (1955)**

ANDRIASHEV, A. P. 1954. Fishes of the north- ern seas of U.S.S.R. Zool. Inst. Acad. Sci. U.S.S.R. Moscow 566 pp. (In Russian), ill.

**Auster et al. (1992)**

Auster, P. J., C. A. Griswold, M. J. Youngbluth & T. G. Bailey, 1992. Aggregations ofmyctophid fishes with other pelagic fauna. Envir. Biol. Fishes 35: 133–139.

**Baughman (1950)**

BAUGHMAN, J.L. 1950. Random notes on Texas fishes. Parts 1 and 2. Tex. J. Sci. 2(1):117-38; 2(2):242-63

**Beebe (1928)**

BEEBE, W. 1928. Beneath tropic seas, a record of diving among the coral reefs of Haiti. G. P. Putnam's Sons, N. Y. xiii + 234, ill.

**Beebe (1936)**

BEEBE, W. 1936. A West Indian grand tour. Bull. N. Y. Zool. Soc. 39(4):127-41, ill.

**Berry (1959)**

BERRY, F. H. 1959. Young jack crevalles (Caranx species) off the southeastern coast of the United States. U. S. Fish & Wildl. Serv. 59(152):417-535, ill.

**Besednov (1960)**

BESEDNOV, L. N. 1960. Some data on the ichthyofauna of the Pacific Ocean driftwood. Acad. Sci. U.S.S.R. Trud. Inst. Oceanogr. 41: 192-7. (In Russian), ill.

**Bigelow & Welsh (1924)**

BIGELOW, H. B. AND W. W. WELCH. 1924. Fishes of the Gulf of Maine. Bull. U. S. Bur. Fish. 40(Pt. 1):1-567, ill.

**Bonaldo et al. (2004)**

Bonaldo RM, Krajewski JP, Sazima I (2004) Does the association of young fishes with jellyfishes protect from predation? A report on a failure case due to damage to the jellyfish. Neotrop Ichthyol 2: 103– 105.

**Brodeur (1998)**

Brodeur, R. D. (1998). In situ observations of the association between juvenile fishes and scyphomedusae in the Bering Sea. *Marine Ecology Progress Series*, *163*, 11-20.

**Cevik et al. (2011)**

Cevik, C., Derici, O. B., & Cevik, F. (2011). First record of Phyllorhiza punctata von Lendenfeld, 1884 (Scyphozoa: Rhizostomeae: Mastigiidae) from Turkey.

**Coleman (1977)**

Coleman N (1977) A field guide to Australian marine life. Rigby, Adelaide

**Collett (1896)**

COLLETT, R. 1896. Poissons provenant des Campagnes du yacht 1'Hirondelle (1885-1888). In Resultats des campagnes Scientifiques . . . Yacht Albert I, Prince . . . de Monaco. Govt. of Monaco. Fasc. (10):1-198, ill.

**Collingwood (1868)**

COLLINGWOOD, C. 1868. Rambles of a natural- ist on the shores and waters of the China Sea . ..in 1866 and 1867. London xiii + 445, ill.

**Colton & Temple 1961**

COLTON, J. B., JR. AND R. F. TEMPLE. 1961. The enigma of Georges Bank spawning. Limnol. & oceanogr. 6(3):280-91, ill.

**Cunningham (1896)**

CUNNINGHAM, J. T. 1886. The eggs and larvae of Teleosteans. Trans. Roy. Soc. Edinburgh 33(Pt. 1):97-136, ill. 1896. The natural history of the marketable marine fishes of the British Islands. Macmillan and Co., Ltd., London xvi+375, ill.

**Davenport and Rees (1993)**

Davenport, J., & Rees, E. I. S. (1993). Observations on neuston and floating weed patches in the Irish Sea. *Estuarine, Coastal and Shelf Science*, *36*(4), 395-411.

**Drazen & Robison (2004)**

Drazen, J. C., & Robison, B. H. (2004). Direct observations of the association between a deep-sea fish and a giant scyphomedusa. *Marine and Freshwater Behaviour and Physiology*, *37*(3), 209-214.

**Duffy (1988)**

Duffy, D.C. 1988. Predator-prey interactions between Common Terns and butterfish. Ornis Scandinavica 19: 160-163

**Eigenmann (1902)**

EIGENMANN, C. H. 1902. Description of a new oceanic fish found off Southern New England. Bull. U. S. Fish Comm. 21:35-6, ill.

**Fitch (1949)**

FITCH, J. E. 1949. Some unusual occurrences of fish on the Pacific Coast. Calif. Fish & Game 35(1):41-9, ill.

**Fowler (1945)**

FOWLER, H. W. 1945. A study of the fishes of the southern Piedmont and Coastal Plain. Monogr. Acad. Nat. Sci. Phila. (7):1-408, ill

**Gosline and Broch (1960)**

GOSLINE, W. A. AND V. E. BROCK. 1960. Hand- book of Hawaiian fishes. Univ. Hawaii Press, Honolulu ix + 372, ill.

**Gunter (1935)**

GUNTER, G. 1935. Records of fishes rarely caught in shrimp trawls in Louisiana. Copeia (1):39-40

**Gunter (1938)**

Gunter G (1938) Seasonal variations in abundance of certain es- tuarine and marine fishes in Louisiana, with particular refer- ence to life histories. Ecol Monogr 8: 313–346

**Gunther (1880)**

GiJNTHER, A. 1880. An introduction to the study of fishes. A. & C. Black, Ltd., Edin- burgh xvi + 720, ill.

**Hardy (1959)**

HARDY, A. C. 1959. The operf sea: its natural history; Part II. Fish and fisheries, with chap- ters on whales, turtles and animals of the sea floor. Collins, London xiv +322, ill.

**Hargitt (1905)**

HARGITT, C. W. 1905. The medusae of the Woods Hole Region. Bull. U. S. Bur. Fish. 24:21-79, ill.

**Hay et al. (1990)**

Hay, S. J., Hislop, J. R. G. and Shanks, A. M. (1990) North Sea Scyphomedusae; summer distribution, estimated biomass and significance particularly for 0-Group gadoid fish. Neth. J. Sea Res., 25, 113–130.

**Heincke & Ehrenbaum (1900)**

HEINCKE, FR. 1900. Eier und Larven von Fischen der Deutschen Bucht; II. Die Bestimmung der Schwimmenden Fischeier und die Methodik der Eimessungen. Komm. Untersuch. deutsch. Meere in Kiel und Biolog. Anstalt Helgoland. Neue Folga 3(2):129-332, ill.

**Hickson (1906)**

HICKSON, S. J. 1906. Coelenterata and cteno- phora. In The Cambridge Nat. Hist. Vol. 1:243-424, ill.

**Hildebrand (1941)**

Hildebrand, S. F. (1941). An annotated list of salt and brackish water fishes, with a new name for a menhaden, found in North Carolina since the publication of" The Fishes of North Carolina" by Hugh M. Smith in 1907. *Copeia*, *1941*(4), 220-232.

**Janssen and Harbison (1981)**

Janssen, J., & Harbison, G. R. (1981). Fish in salps: the association of squaretails (Tetragonurus spp.) with pelagic tunicates. *Journal of the Marine Biological Association of the United Kingdom*, *61*(4), 917-927

**Jones (1960)**

JONES, S. 1960. Notes on animal associations. 2. The scyphomedusa Acromitus flagellatus

Stiasny and young Seleroides leptolepis (Cuvier & Valenciennes) with the latter forming a

vanguard. J. Mar. Biol. Assn. India 2(1):51-2, ill.

**Jordan (1923)**

JORDAN, D. S. 1923. Note on Icichthys locking- toni Jordan and Gilbert, a pelagic fish from California. Proc. U. S. Nat. Mus. 63(4):1-3, ill.

**Jordan & Evermann (1896)**

JORDAN, D. S. AND B. EVERMANN. 1896-1900. The fishes of North and Middle America. Four volumes. Bull. U. S. Nat. Mus. 96:1-3313, ill.

**Kennedy (1954)**

KENNEDY, M. 1954. The sea angler's fishes. Hutchinson, London xiv + 524, ill.

**Kishinouye (1910)**

KISHINOUYE, K. 1910. Some medusae of Japanese waters. Coll. Sci. Univ. Tokyo 27(9):1- 35, ill.

**Kingsford et al. (2000)**

Kingsford, M.J., Pitt, K.A. and Gillanders, B.M. (2000) Management of jellyfish fisheries, with special reference to the order Rhizostomeae. Oceanography and Marine Biology Annual Review 38, 85–156.

**Kobayashi (1961)**

KOBAYASHI, K. 1961. Primary record of Psenes maculatus Liitken, from the North Pacific. Bull. Fac. Fish. Hokkaido Univ. Hakodate, Japan 11(4):191-4.

**Koeller et al. (1986)**

Koeller, P. A., P. C. F. Hurley, P. Perley & J. D. Neilson, 1986. Juvenile fish surveys on the Scotian Shelf: implications for year- class size assessments. J. Cons. int. Explor. Mer. 43: 59–76.

**Kondo et al. (2014)**

Kondo, Y., Ohtsuka, S., Nishikawa, J., Metillo, E., Pagliawan, H., Sawamoto, S., ... & Urata, M. (2014). Associations of fish juveniles with rhizostome jellyfishes in the Philippines, with taxonomic remarks on a commercially harvested species in Carigara Bay, Leyte Island. *Plankton and Benthos Research*, *9*(1), 51-56.

**Larson (1987)**

Larson RJ (1987) Daily ration and predation by medusae and ctenophores in Saanich Inlet, B.C., Canada. Neth J Sea Res.

**La Gorce (1924)**

LAGORCE, J. O. 1924. Fishes and fisheries of our north Atlantic seaboard. In The Book of Fishes. Nat. Geo. Soc. Wash. 76 pp., ill.

**Le Danois (1949)**

LE DANOIS, E. 1949. Vie et moeurs des pois- sons. Payot, Paris 335 pp., ill.Cooco (1834), Padoa

**Limbaugh (1955)**

Limbaugh, C. (1955) Fish life in the kelpbeds and effects of da harvesting. Univ. Calif. Inst. Mar. Resources.Ref. 55–9, 1–58.

**Lunel (1884)**

LUNEL, G. 1884. Sur un cas de commensalisme d'un Caranx et d'une Crambessa. Rec. Zool.

Suisse 1:65-74. Also 1893. Ann. Mag. Nat. Hist. Ser. 5, 12:264-70.

**Malm (1852)**

MALM, A. W. 1852. Ichthyologiska anmlirkningar. Ofvers. Vetensk. Akad. F6rhandl. Stockholm 9:223-34

**Malm (1877)**

MALM, A. W. 1877. Goteborgs och Bohuslans Fauna, ryggradsajuren. Goteborg.

**Mansueti 1963**

Mansueti, R. (1963). Symbiotic behavior between small fishes and jellyfishes, with new data on that between the stromateid, Peprilus alepidotus, and the scyphomedusa, Chrysaora quinquecirrha. Copeia, 40-80.

**Martin & Kuck (1991)**

Martin, J. W. & H. G. Kuck, 1991. Faunal associates of an un- described species of Chrysaora (Cnidaria, Scyphozoa) in the Southern California Bight, with notes on unusual occurrences of other warm water species in the area. Bull. South. Calif. Acad. Sci. 90: 89–101

**Martinez & Romero (2008)**

López, M. J., & Rodríguez, R. J. (2008). First record of association of the blackfin jack Hemicaranx zelotes with the cannonball jellyfish Stomolophus meleagris in Kino Bay, Gulf of California. Hidrobiologica, 18, 173-176.

**Masuda et al. (2008)**

Masuda, R., Yamashita, Y., & Matsuyama, M. (2008). Jack mackerel Trachurus japonicus juveniles use jellyfish for predator avoidance and as a prey collector. *Fisheries Science*, *74*(2), 276-284.

**Masuda (2009)**

Masuda, R. (2008). Ontogenetic changes in the ecological function of the association behavior between jack mackerel Trachurus japonicus and jellyfish. In *Jellyfish Blooms: Causes, Consequences, and Recent Advances* (pp. 269-277). Springer, Dordrecht.

**Matthews & Shoemaker 1952**

MATTHEWS, J. E. AND H. H. SHOEMAKER. 1952. Fishes using ctenophores for shelter. Copeia (4):270

**Mayer (1910)**

MAYER, A. G. 1910. Medusae of the world. Vol. I and II. Hydromedusae; Vol III. Scyphomedusae. Carneg. Inst. Wash. Pub. (109):1-735, ill.

**Moreira (1961)**

Moreira MGBS (1961) Soˆbre Mastigias scintillae sp. nov. das costas do Brasil. Boletim do Instituto Oceanogra`fico 11:5–30 (in Portuguese)

**Morton (1972)**

Morton, B. (1972). The occurrence of Caranx kalla and C. malabaricus in association with the jellyfish, Cyanea nozakii. *Copeia*, *1972*(4), 873-875.

**Munro (1958)**

MUNRO, I. S. R. 1958. Handbook of Australian fishes. Austral. Fish. Newsletter 17(12):124, ill.

**Munro (1960)**

MUNRO, I. S. R. 1960. Ibid. Austral. Fish. Newsletter 19(5):17-20, ill.

**Nagabhushanam (1964)**

Nagabhushanam, A. K. (1964). On the biology of the whiting, Gadus merlangus, in Manx waters. *Journal of the Marine Biological Association of the United Kingdom*, *44*(1), 177-202

**Nichols (1938)**

NICHOLS, J. T. 1937. Notes on carangin fishes. Am. 1938. On Caranx mate ludini. (Jordan and Seale). Copeia 1938(3):144-5

**Nichols (1940)**

NICHOLS, J. T 1940. Notes on carangin fishes. V.-Young Trachurus in the Gulf of Mexico. Am. Mus. Novitates. (1067):1-4.

**Nichols and Breder (1927)**

NICHOLS, J. T AND C. M. BREDER, JR. 1927. Marine fishes of New York and southern New Eng- land. Zoologica 9(1):1-192, ill.

**Nichols and Murphy (1922)**

NICHOLS, J. T. AND R. C. MURPHY. 1922. On a collection of marine fishes from Peru. Bull. Am. Mus. Nat. Hist. 46(9):501-16, ill.

**Noble (1963)**

Noble A (1963) On the association between the fish, Caranx mal- abaricus Cuv. & Val. and the siphonophore, Porpita pacifica Lesson. J Mar Biol Ass India 5: 142–143.

**O’Connor & McGrath (1978)**

O’Connor, B. & D. McGrath, 1978. On the occurrence of the scyphozoan Rhizostoma octopus (L.) around the Irish Coast in 1976. Ir. Nat. J. 19: 261–263.

**Oshtuka et al. (2004)**

Ohtsuka S, Hora M, Suzaki T, Arikawa M, Omura G, Yamada K (2004) Morphology and host-specificity of the apostome ciliate Vampyrophrya pelagica infecting pelagic copepods in the Seto Inland Sea, Japan. Mar Ecol Prog Ser 282: 129–142

**Ohtsuka et al. (2010)**

Ohtsuka, S., Koike, K., Lindsay, D., Nishikawa, J., Miyake, H., Kawahara, M., ... & Komatsu, H. (2009). Symbionts of marine medusae and ctenophores. *Plankton and Benthos Research*, *4*(1), 1-13.

**Pagès et al. (1996)**

Pagès, F., M. G. White & P. G. Rodhouse, 1996. Abundance of gelatinous carnivores in the nekton community of the Antarctic Polar Frontal Zone in summer 1994. Mar. Ecol. Prog. Ser. 141: 139–147

**Panikkar & Prasad (1952)**

PANIKKAR, N. K. AND R. R. PRASAD. 1952. On an interesting association of Ophiuroids, fish and crab with the jellyfish Rhopilema hispi- dum. J. Bombay Nat. Hist. Soc. 51(1):295-6.

**Parin (1858)**

PARIN, N. V. 1858. Pelagic ichthyofauna of the northwestern Pacific Ocean. Priroda (Nature) 47(5):60-6. (In Russian), ill

**Peach (1855)**

PEACH, C. W. 1855. Notes on the habits of medusae and of small fishes. Proc. Linn. Soc. London 2:280-1.

**Pearson (1941)**

PEARSON, J. C. 1941. The young of some marine fishes taken in lower Chesapeake Bay, Virginia, with special reference to the gray sea trout, Cynoscion regalis (Bloch). U. S. Fish & Wildl. Serv. Fish. Bull.

**Pellegrin (1905)**

PELLEGRIN, J. 1905. Commensalisme des jeunes Caranx et de Rhizostomidae. C. R. Assoc. France av. Sci. Cherbourg 34(2):570-1

**Phillips et al. (1969)**

PHILLIPS, P. J., BURKE, W. D., and KEENER, E. J. 1969. Observa- tions on the trophic significance of jellyfishes in Mississippi Sound with quantitative data on the associative behaviour of small fishes with medusae. Trans. Am. Fish. Soc. 98: 703 -7 12

**Purcell et al. (2000)**

Purcell JE, Brown ED, Stokesbury KDE, Haldorson LH, Shirley TC (2000) Aggregations of the jellyfish Aurelia labiata: abundance, distribution, association with age-0 walleye pollock, and behaviors promoting aggregation in Prince William Sound, Alaska, USA. Mar Ecol Prog Ser 195:145–158

**Rees (1966)**

Rees, W. J. (1966). Cyanea lamarcki Péron & Lesueur (Scyphozoa) and its association with young Gadus merlangus L.(Pisces). *Annals and Magazine of Natural History*, *9*(100-102), 285-287.

**Reese and Brodeur (2015)**

Reese, D. C., & Brodeur, R. D. (2015). Species associations and redundancy in relation to biological hotspots within the northern California Current ecosystem. Journal of Marine Systems, 146, 3-16.

**Riascos et al. (2012)**

Riascos JM, Vergara M, Fajardo J, Villegas V, Pacheco AS (2012) The role of hyperiid parasites as a trophic link between jellyfish and fishes. J Fish Biol 81: 1686−1695

**Risso (1810)**

Risso, A. 1810. Ichthyologie de Nice. Chez F. Schoell, Paris xxxvi + 388, ill.

**Robison (1983)**

Robison, B. H., 1983. Midwater biological research with the WASP ADS. Mar. Tech. Soc. J. 17: 21–27.

**Robison (1984)**

Robison, B.H. (1984). Herbivory by the myctophid fish Ceratoscopelus warmingii. Mar. Biol., 84, 119–123

**Rountree (1983)**

Rountree, R. A. (1983). The ecology of Stomolophus meleagris, the cannon ball jellyfish, and its symbionts, with special emphasis on behavior. *Unpublished manuscript. Wilmington, NC, University of North Carolina*.

**Sars (1879)**

SARS, G. O. 1879A. Report of practical and scientific investigations of the cod fisheries near the Loffoden Islands, . . . 1864-69. Trans- lated by H. Jacobsen from Norwegian. Rept. Dept. Interior, Christiania, 1869. Rept. U. S. Fish Comm. 1877 (5):565-611.

**Sato et al. (2015)**

Nakamura, I., Goto, Y., & Sato, K. (2015). Ocean sunfish rewarm at the surface after deep excursions to forage for siphonophores. Journal of Animal Ecology, 84(3), 590-603.

**Scheffer (1940)**

SCHEFFER, V. B. 1940. Two recent records of Zaprora silenus Jordan from the Aleutian Islands. Copeia (3):203.

**Scheuring (1915)**

SCHEURING, L. 1915. Beobachtung fiber den Parasitismus pelagischer Jungfische. Biol. Centralblatt. 35:181-90

**Schultz (1962)**

SCHULTZ, L. P. 1962. [MS. addenda to "Fishes of the Marshall Islands"]. U. S. Nat. Mus.

**Scortecci (1957)**

SCORTECCI, G. 1957. Animali: come sono, dove vivono, come vivono. Volume 5. Anfibi, Pesci. Edizioni Labor, Milano 1021 pp.,ill

**Sherrin (1886)**

SHERRIN, R. A. A. 1886. Handbook of the fishes of New Zealand. Wilson & Horton, Auckland 307 pp.,

ill.

**Shojima (1962)**

Shojima Y (1962) On the postlarvae and juveniles of carangid fishes collected together with the jellyfishes. Contrib Seikai Regional Fish Res 147: 48–58. (in Japanese with English abstract)

**Shojima (1963)**

Shojima Y (1963) Scyllarid phyllosomas’ habit of accompanying the jelly-fish. Bull Jap Soc Sci Fish 29: 349–353

**Smith (1907)**

SMITH, H. M. 1907. The fishes of North Carolina. N. C. Geol. Econ. Surv. Vol. 2:xi + 453, Ill.

**Smith (1949)**

SMITH, J. L. B. 1949. The stromateid fishes of South Africa. Ann. Mag. Nat. Hist. Ser. 12, 2(23):839-51.

**Smith (1950)**

SMITH, J. L. B. 1950. The sea fishes of South Africa. Central News Agency, Ltd., Capetown xvi + 550. Also Fourth Ed. 1961. Ibid. xvi +480, ill.

**Southcott & Glover (1987)**

Southcott R V, Glover CJM. THE OCCURRENCE OF DESMONEMA-GAUDICHAUDI NEW-RECORD LESSON SCYPHOZOA SEMAEOSTOMEAE IN SOUTH AUSTRALIAN WATERS WITH RECORDS OF FISH-JELLYFISH SYMBIOSES. Transactions of The Royal Society of South Australia. 1987;111:131–2

**Spanier & Galil (1991)**

Spanier, E., & Galil, B. S. (1991). Lessepsian migration: a continuous biogeographical process. *Endeavour*, *15*(3), 102-106.

**Stead (1900)**

STEAD, D. G. 1906. Fishes of Australia; a pop- ular and systematic guide to the study of the wealth within our waters. Wm. Brooks & Co.,Sydney xii + 278, ill.

**Thiel (1979)**

Thiel, H., 1979. Assoziationen von Quallen und Fischen. Nat. Mus. 109: 353–360.

**Tolley (1987)**

TOLLEY, S. G. 1987. Association of young Chloroscombrus chry- sur1i.s (Pisces: Carangidae) with the jellyfish Aurelia aurira. Copeia, 1987: 216-219.

**Tomiyana (1954)**

TOMIYAMA, I. AND T. ABE. 1954. Figures and descriptions of the fishes of Japan (a continu- ation of Dr. Shigaho Tanaka's work). Kazamna Shobo, Tokyo 50:983-1011, ill

**Van Benedan (1876)**

VAN BENEDEN, J. P. 1876. Animal parasites and messmates. Kegan Paul, Trench & Co., London xxviii + 274, ill. (fourth ed. publ. in 1889

**Whitley (1947)**

WHITLEY, G. P. 1947. The shepherd fish and its flock (popular account of stromateoid and allied fishes). Austral. Mus. Mag. Sydney 9: 194-200, ill.

**Yasuda (2003)**

Yasuda T (2003) Jellyfish: UFO of the sea. Koseisha- Koseikaku, Tokyo (in Japanese)
